# Supplementary material for: Smoke-free legislation reduces hospital admissions for childhood lower respiratory tract infection
Source: HighWire-hosted journal article supplement (doi:10.1136/tobaccocontrol-2015-052541), 2016-01-14
Supplement: tobaccocontrol-2015-052541supp.pdf [file tobaccocontrol-2015-052541supp.pdf]

**Table S1. Pearson's correlation coefficients among environmental variables in Hong Kong between 2004 and 2012**

|                                        | Temperature | Humidity | Rainfall | PM <sub>10</sub> | PM <sub>2.5</sub> | SO <sub>2</sub> | NO <sub>2</sub> |
|----------------------------------------|-------------|----------|----------|------------------|-------------------|-----------------|-----------------|
| <b>Whole year</b>                      |             |          |          |                  |                   |                 |                 |
| Humidity (%)                           | 0.22        |          |          |                  |                   |                 |                 |
| Rainfall (mm)                          | 0.13        | 0.34     |          |                  |                   |                 |                 |
| PM <sub>10</sub> (mg/m <sup>3</sup> )  | -0.32       | -0.45    | -0.25    |                  |                   |                 |                 |
| PM <sub>2.5</sub> (mg/m <sup>3</sup> ) | -0.32       | -0.41    | -0.24    | 0.92             |                   |                 |                 |
| SO <sub>2</sub> (mg/m <sup>3</sup> )   | 0.08        | -0.23    | -0.09    | 0.43             | 0.53              |                 |                 |
| NO <sub>2</sub> (mg/m <sup>3</sup> )   | -0.34       | -0.38    | -0.19    | 0.67             | 0.74              | 0.43            |                 |
| O <sub>3</sub> (mg/m <sup>3</sup> )    | 0.04        | -0.55    | -0.23    | 0.55             | 0.53              | 0.13            | 0.48            |
| <b>Cold season (October-March)</b>     |             |          |          |                  |                   |                 |                 |
| Humidity (%)                           | 0.17        |          |          |                  |                   |                 |                 |
| Rainfall (mm)                          | 0.11        | 0.25     |          |                  |                   |                 |                 |
| PM <sub>10</sub> (mg/m <sup>3</sup> )  | -0.08       | -0.46    | -0.22    |                  |                   |                 |                 |
| PM <sub>2.5</sub> (mg/m <sup>3</sup> ) | -0.07       | -0.36    | -0.20    | 0.96             |                   |                 |                 |
| SO <sub>2</sub> (mg/m <sup>3</sup> )   | 0.01        | -0.28    | -0.10    | 0.60             | 0.64              |                 |                 |
| NO <sub>2</sub> (mg/m <sup>3</sup> )   | -0.13       | -0.36    | -0.17    | 0.65             | 0.66              | 0.55            |                 |
| O <sub>3</sub> (mg/m <sup>3</sup> )    | 0.39        | -0.50    | -0.17    | 0.50             | 0.44              | 0.13            | 0.33            |
| <b>Warm season (April-September)</b>   |             |          |          |                  |                   |                 |                 |
| Humidity (%)                           | -0.05       |          |          |                  |                   |                 |                 |
| Rainfall (mm)                          | 0.04        | 0.39     |          |                  |                   |                 |                 |
| PM <sub>10</sub> (mg/m <sup>3</sup> )  | -0.36       | -0.28    | -0.20    |                  |                   |                 |                 |
| PM <sub>2.5</sub> (mg/m <sup>3</sup> ) | -0.36       | -0.26    | -0.21    | 0.87             |                   |                 |                 |
| SO <sub>2</sub> (mg/m <sup>3</sup> )   | 0.17        | -0.24    | -0.10    | 0.36             | 0.54              |                 |                 |
| NO <sub>2</sub> (mg/m <sup>3</sup> )   | -0.36       | -0.25    | -0.14    | 0.62             | 0.76              | 0.40            |                 |
| O <sub>3</sub> (mg/m <sup>3</sup> )    | -0.13       | -0.54    | -0.22    | 0.53             | 0.57              | 0.15            | 0.55            |

PM<sub>10</sub>, particulate matter with aerodynamic diameter <10 µm; PM<sub>2.5</sub>, particulate matter with aerodynamic diameter <2.5 µm; SO<sub>2</sub>, sulphur dioxide; NO<sub>2</sub>, nitrogen dioxide; O<sub>3</sub>, ozone

**Table S2. Different lag days for LRTI admission**

|             | <b><u>Lower respiratory tract infection</u></b> |           |            |
|-------------|-------------------------------------------------|-----------|------------|
|             | Overall                                         | Preschool | School-age |
| Temperature | Lag 0                                           | Lag 5     | Lag 0      |
| Humidity    | Lag 1                                           | Lag 0     | Lag 4      |
| Rainfall    | Lag 0                                           | Lag 0     | Lag 5      |

**Table S3. Daily percentage change in daily hospital admission rates for lower respiratory tract infection (LRTI) per interquartile range (IQR) increase of the four pollutants in children aged 0 to 18 years between 2004 and 2012**

|                                | <b>Daily percentage change in hospital admission for LRTI (95% CI)</b> |                            |
|--------------------------------|------------------------------------------------------------------------|----------------------------|
|                                | Whole group (0 to18 years)                                             | Preschool (0 to 5 years)   |
| PM <sub>2.5</sub> <sup>^</sup> | 1.6 (-0.9 to 4.1)                                                      | <b>2.6 (0.1 to 5.1)</b>    |
| SO <sub>2</sub>                | <b>-2.0 (-3.3 to -0.7)</b>                                             | <b>-2.2 (-3.6 to -0.8)</b> |
| NO <sub>2</sub>                | 2.9 (1.0 to 4.9)                                                       | <b>3.6 (1.6 to 5.8)</b>    |
| O <sub>3</sub>                 | <b>9.7 (7.0 to 12.5)</b>                                               | <b>10.7 (8.0 to 13.4)</b>  |

PM<sub>2.5</sub>, particulate matter with aerodynamic diameter <2.5 µm; SO<sub>2</sub>, sulphur dioxide; NO<sub>2</sub>, nitrogen dioxide; O<sub>3</sub>, ozone
